# Supplementary material for: Global 5-Hydroxymethylcytosine Levels Are Profoundly Reduced in Multiple Genitourinary Malignancies
Source: PubMed Central journal article supplement (PMC4718593; doi:10.1371/journal.pone.0146302), 2016-01-19
Supplement: pone.0146302.s002.pdf [file pone.0146302.s002.pdf]

A

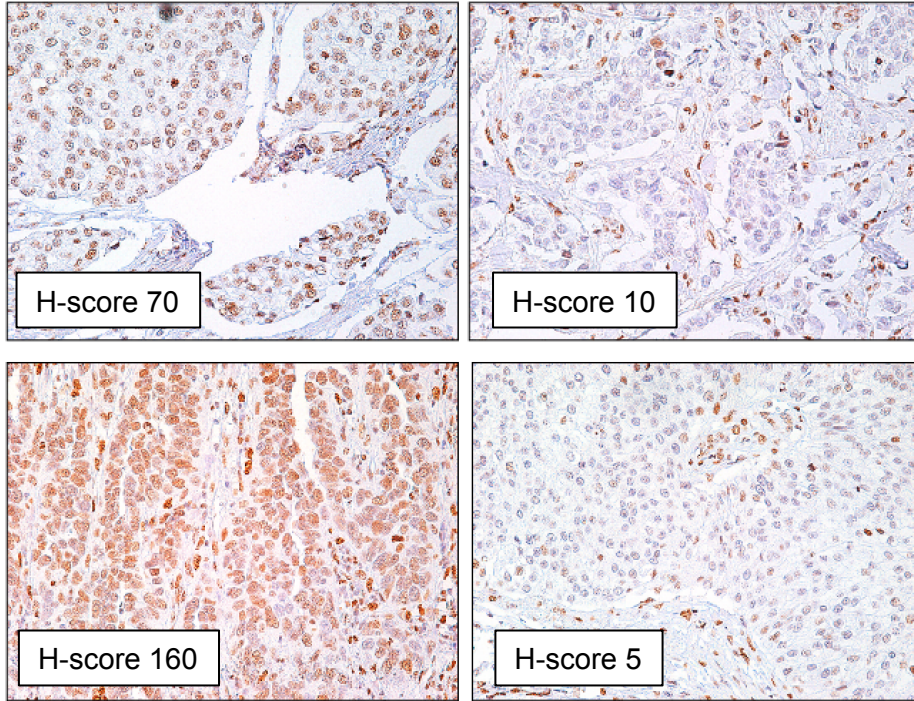

B

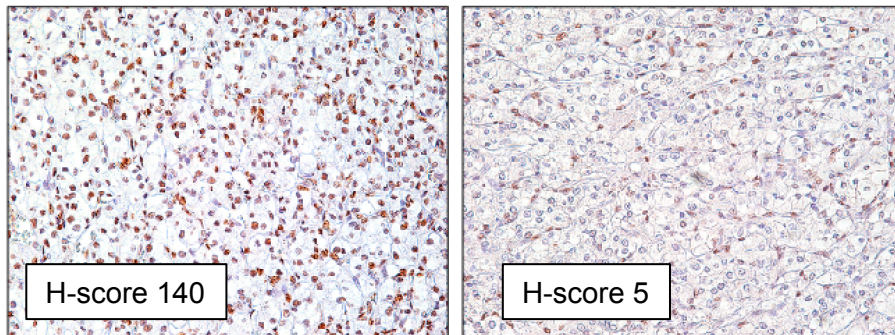

C

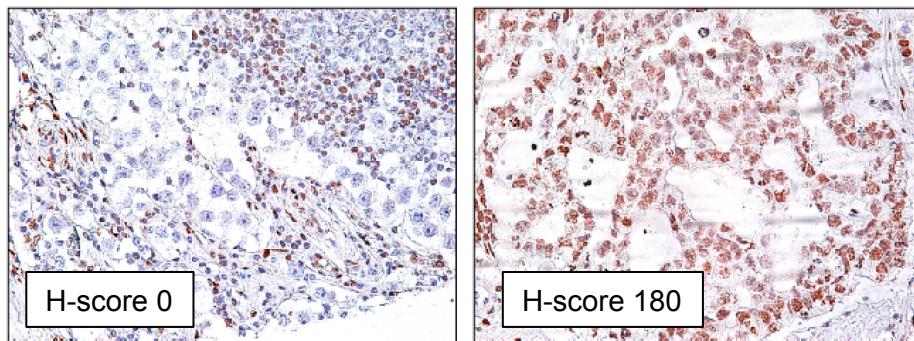

**S1 Fig. Representative images and H-scores of (A) urothelial carcinoma, (B) clear cell renal cell carcinoma and (C) testicular germ cell tumors stained for 5hmC.**
