# Supplementary material for: Global 5-Hydroxymethylcytosine Levels Are Profoundly Reduced in Multiple Genitourinary Malignancies
Source: PubMed Central journal article supplement (PMC4718593; doi:10.1371/journal.pone.0146302), 2016-01-19
Supplement: pone.0146302.s003.pdf [file pone.0146302.s003.pdf]

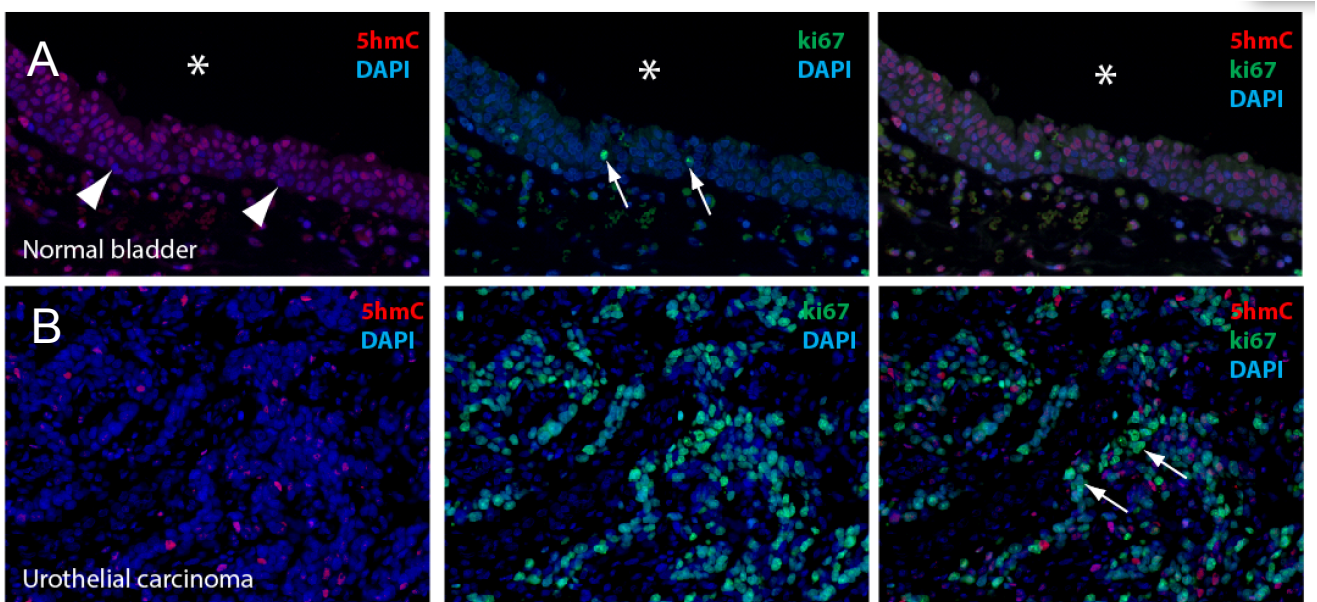

**S2 Fig. Co-immunolabeling of 5hmC and ki67 in normal bladder and urothelial carcinoma of the bladder.** (A) Co-immunolabeling of 5hmC (red) and ki67 (green) in normal urothelium shows low ki67 labeling (mostly localized in the intermediate cell layer) and a gradual increase of 5hmC with increased distance from the basal cell layer. (B) In urothelial carcinoma 5hmC levels are uniformly reduced. Ki67 labeling is present in a large fraction of cells (arrows). No difference in 5hmC immunoreactivity is detected between ki67 positive and ki67 negative cells.
