# Supplementary material for: Global 5-Hydroxymethylcytosine Levels Are Profoundly Reduced in Multiple Genitourinary Malignancies
Source: PubMed Central journal article supplement (PMC4718593; doi:10.1371/journal.pone.0146302), 2016-01-19
Supplement: pone.0146302.s004.pdf [file pone.0146302.s004.pdf]

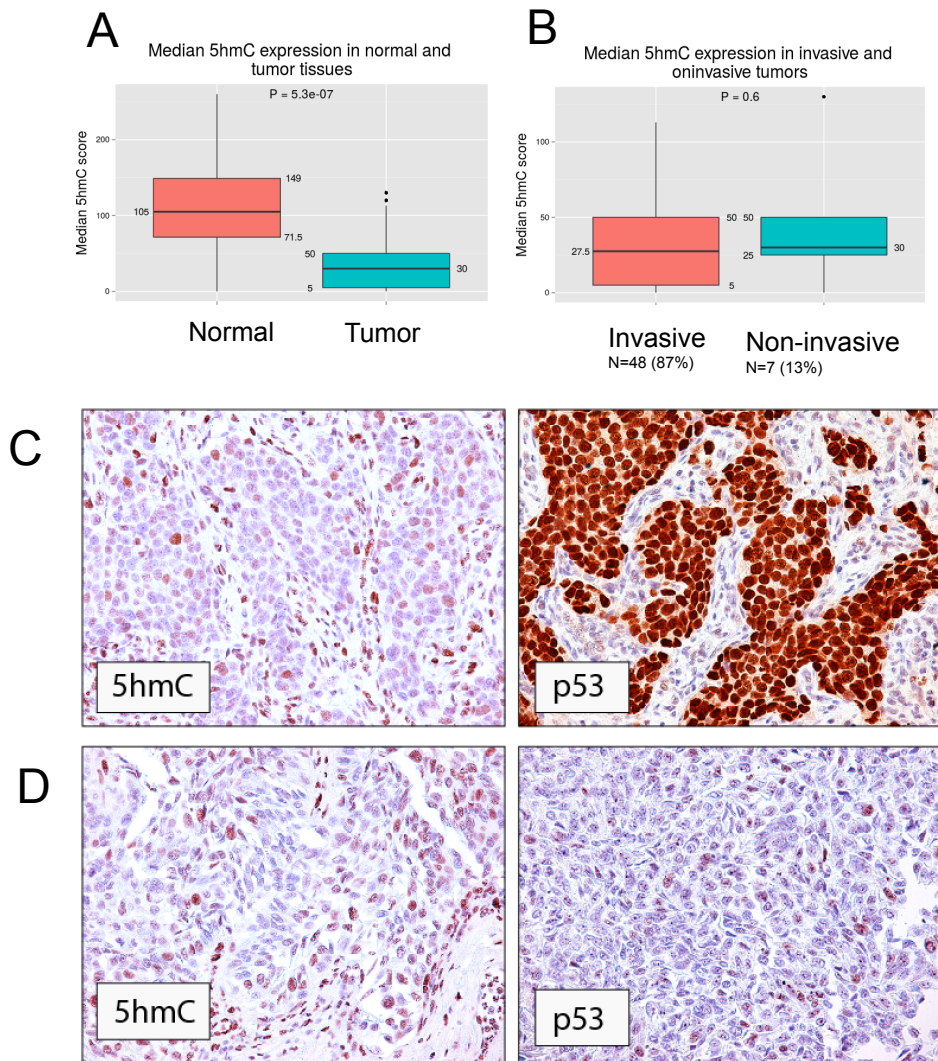

**S3 Fig. 5hmC levels in invasive and superficial urothelial cell carcinoma of the bladder.** (A) Box plot shows 5hmC H-score distribution of tumor and normal urothelium. (B) H-score distribution in invasive and non-invasive urothelial cell carcinoma. (C) Representative micrographs of invasive urothelial carcinoma of the bladder stained for 5hmC and p53. (D) Representative micrographs of non-invasive urothelial carcinoma of the bladder stained for 5hmC and p53. Note that Invasive carcinoma show nuclear accumulation of p53 suggestive of mutant *TP53*. 5hmC levels are not different between invasive and non-invasive carcinoma.
