# Supplementary material for: Global 5-Hydroxymethylcytosine Levels Are Profoundly Reduced in Multiple Genitourinary Malignancies
Source: PubMed Central journal article supplement (PMC4718593; doi:10.1371/journal.pone.0146302), 2016-01-19
Supplement: pone.0146302.s007.pdf [file pone.0146302.s007.pdf]

**A** Comparison of 5hmC H-scores in normal tissue vs. primary tumors vs. metastatic tumors

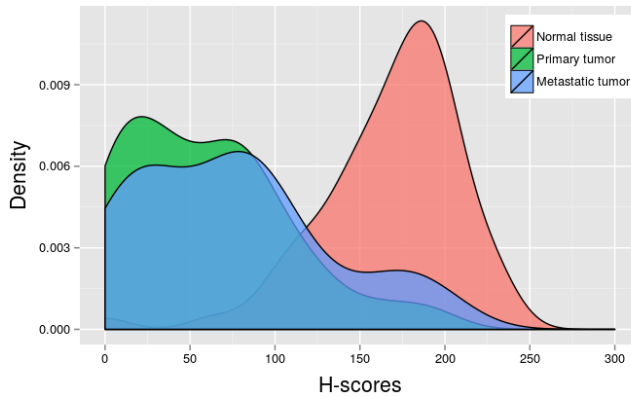

**B** Comparison of 5hmC H-scores by Fuhrman grade

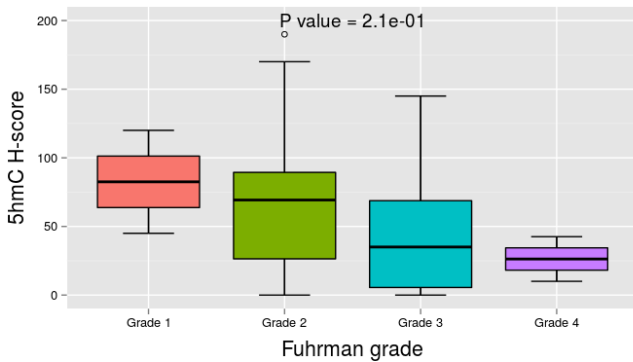

**C** Comparison of 5hmC levels by Fuhrman grade

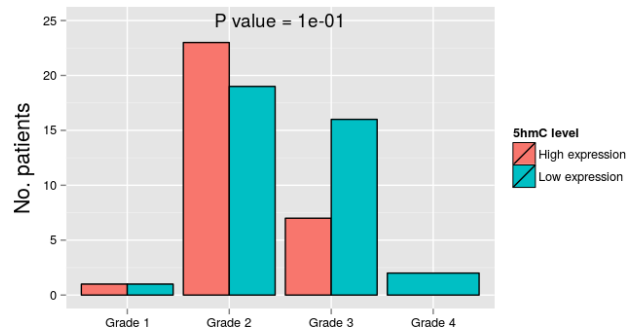

**S6 Fig. 5hmC levels in normal kidney, primary renal cell carcinoma and metastatic renal cell carcinoma.** (A) Density plot shows distribution of 5hmC levels in normal tissue (red) and primary tumor (green) and metastatic (blue) samples. Note that normal tissue shows a dense peak at high H-score values, whereas both primary and metastatic renal cell carcinoma are characterized by low 5hmC levels. (B) Association of 5hmC and Fuhrman grade. Box plots show distribution of 5hmC H-scores in different Fuhrman grade groups. (C) Breakdown of 5hmC staining levels in Fuhrman groups. Note the shift in 5hmC H-score levels at the transition from grade  $\leq 2$  to  $\geq 3$ .
