# Supplementary material for: Global 5-Hydroxymethylcytosine Levels Are Profoundly Reduced in Multiple Genitourinary Malignancies
Source: PubMed Central journal article supplement (PMC4718593; doi:10.1371/journal.pone.0146302), 2016-01-19
Supplement: pone.0146302.s009.pdf [file pone.0146302.s009.pdf]

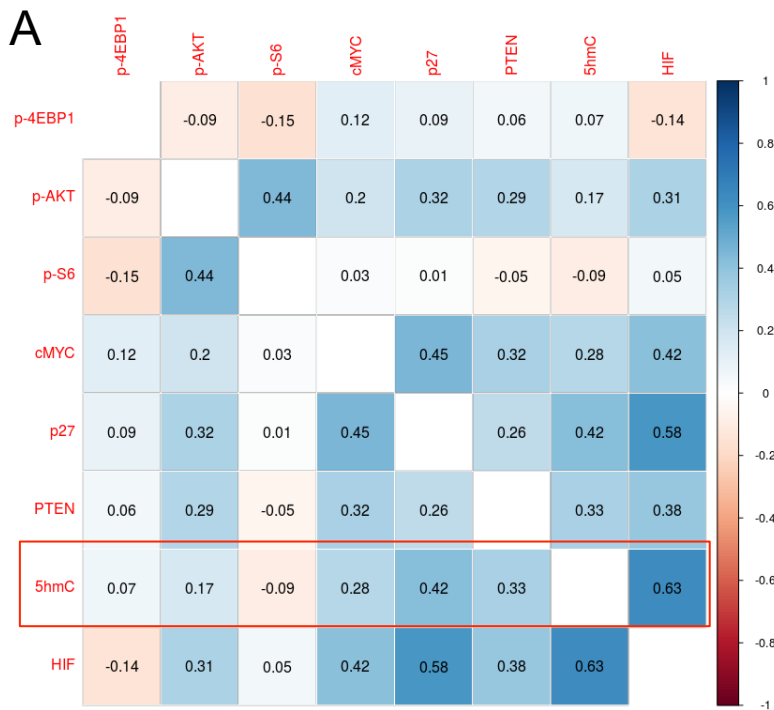

**B**

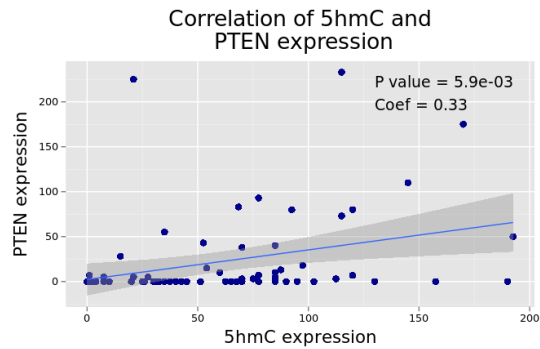

**C**

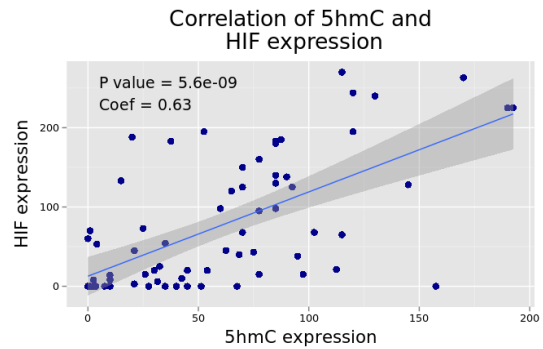

**D**

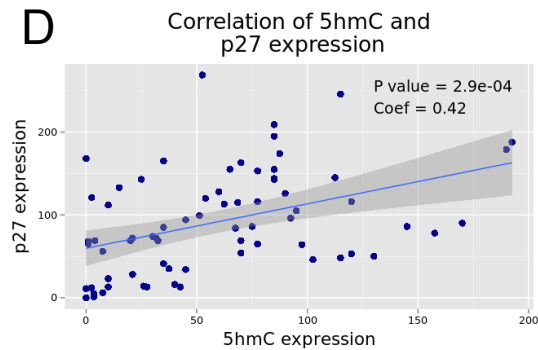

**S8 Fig. Correlation between 5hmC levels and previously determined markers of the mTOR pathway.** (A) Correlation matrix of investigated markers. Heat map shows correlation coefficient and directionality. (B, C, D) scatter plots of statistically significantly correlated markers.
