# Supplementary material for: Global 5-Hydroxymethylcytosine Levels Are Profoundly Reduced in Multiple Genitourinary Malignancies
Source: PubMed Central journal article supplement (PMC4718593; doi:10.1371/journal.pone.0146302), 2016-01-19
Supplement: pone.0146302.s011.pdf [file pone.0146302.s011.pdf]

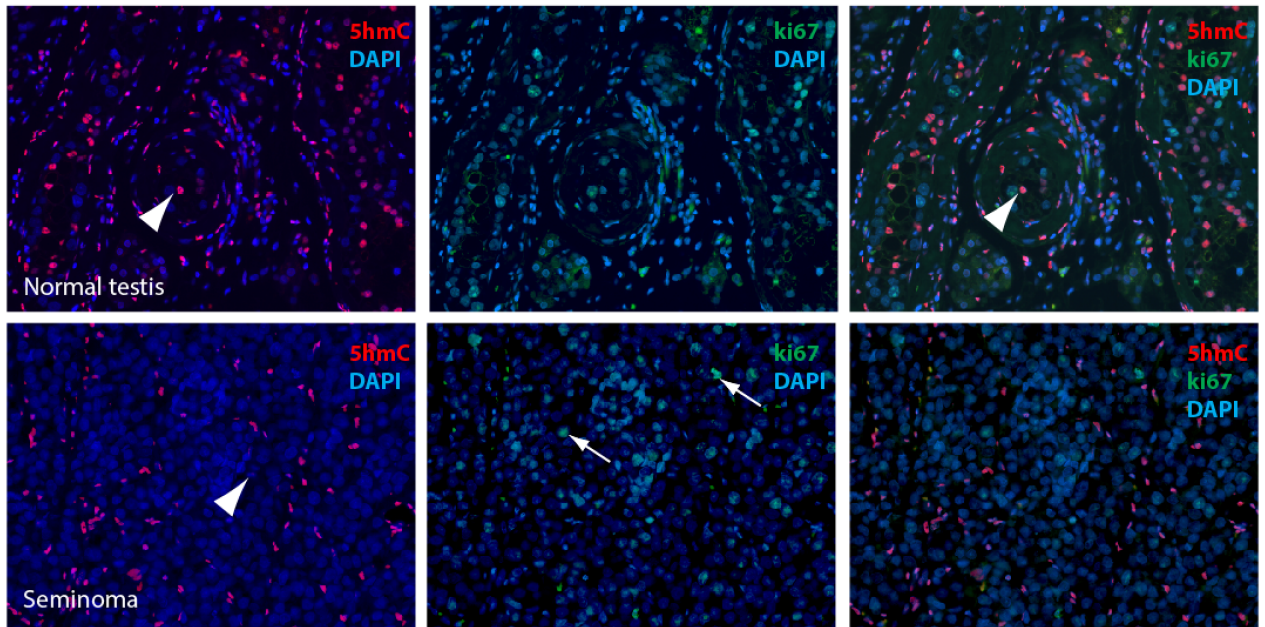

**Supplementary Figure 10. Co-immunolabeling of 5hmC and ki67 in normal testis and seminoma.** Note that in normal seminiferous tubules Sertoli cells show strong immunoreactivity for 5hmC. Seminoma shows greatly reduced 5hmC levels and interspersed ki67 positive cells (arrows).
