# Supplementary material for: Global 5-Hydroxymethylcytosine Levels Are Profoundly Reduced in Multiple Genitourinary Malignancies
Source: PubMed Central journal article supplement (PMC4718593; doi:10.1371/journal.pone.0146302), 2016-01-19
Supplement: pone.0146302.s012.pdf [file pone.0146302.s012.pdf]

**S1 Table . Cox regression for Cancer-related mortality in bladder cancer cohort.**

| <b>Variables</b>                     | <b>HR</b>   | <b>Lower 95% CI</b> | <b>Upper 95% CI</b> | <b>P value</b> |
|--------------------------------------|-------------|---------------------|---------------------|----------------|
| Age group: Older vs. Younger         | <b>0.97</b> | 0.56                | 1.69                | <i>0.92</i>    |
| Sex                                  | <b>2.75</b> | 0.82                | 9.19                | <i>0.062</i>   |
| Race                                 | <b>1.7</b>  | 0.4                 | 7.24                | <i>0.44</i>    |
| Neoadjuvant radiotherapy             | <b>0.55</b> | 0.074               | 4.12                | <i>0.52</i>    |
| Neoadjuvant chemotherapy             | <b>1.18</b> | 0.35                | 4                   | <i>0.79</i>    |
| Intravesical chemotherapy            | <b>0.85</b> | 0.35                | 2.06                | <i>0.71</i>    |
| Adjuvant radiotherapy                | <b>0.24</b> | 0.031               | 1.84                | <i>0.089</i>   |
| Adjuvant chemotherapy                | <b>1.83</b> | 0.84                | 4                   | <i>0.13</i>    |
| Early complications                  | <b>1.17</b> | 0.51                | 2.69                | <i>0.71</i>    |
| Late complications                   | <b>0.67</b> | 0.31                | 1.46                | <i>0.31</i>    |
| Lymph node metastasis                | <b>6.18</b> | 2.13                | 17.92               | <i>0.0024</i>  |
| Distant metastasis                   | <b>2.2</b>  | 0.87                | 5.57                | <i>0.096</i>   |
| Lymphovascular invasion              | <b>0.82</b> | 0.36                | 1.9                 | <i>0.64</i>    |
| Muscle-invasive disease              | <b>0.52</b> | 0.15                | 1.8                 | <i>0.34</i>    |
| High 5hmC expression (upper median)  | <b>1.11</b> | 0.51                | 2.41                | <i>0.8</i>     |
| High 5hmC expression (upper tertile) | <b>1.71</b> | 0.68                | 4.33                | <i>0.23</i>    |
