# Supplementary material for: Global 5-Hydroxymethylcytosine Levels Are Profoundly Reduced in Multiple Genitourinary Malignancies
Source: PubMed Central journal article supplement (PMC4718593; doi:10.1371/journal.pone.0146302), 2016-01-19
Supplement: pone.0146302.s013.pdf [file pone.0146302.s013.pdf]

**S2 Table.****Cox regression: Cancer-related mortality\***

| <b>Variables</b>                     | <b>P value</b> |
|--------------------------------------|----------------|
| Age group: Above vs. below median    | 0.15           |
| Sex                                  | 0.2            |
| Race                                 | 0.77           |
| Tumor size: Above vs. below median   | 0.09           |
| High pT stage (>pT1a)                | 0.09           |
| High Fuhrman grade (>2)              | 0.053          |
| Tumor multifocality                  | 0.4            |
| Invasion of surgical margins         | 0.55           |
| Tumor progression                    | 0.0016         |
| High 5hmC expression (upper median)  | 0.15           |
| High 5hmC expression (upper tertile) | 0.33           |
